# Supplementary material
Source: PubMed Central journal article supplement (PMC7236072)
Supplement: BPH-177-2696-s001.pdf [file BPH-177-2696-s001.pdf]

## Supporting information

**Table S1: Properties of small molecules and antibodies used in the present study.**

| Compound/<br>mAb | Activity in cell-based<br>adhesion assays<br>(IC <sub>50</sub> shown if not<br>otherwise indicated) | Reference                                                                         | Comments                                                                                                                                                                                                                                                                                            |
|------------------|-----------------------------------------------------------------------------------------------------|-----------------------------------------------------------------------------------|-----------------------------------------------------------------------------------------------------------------------------------------------------------------------------------------------------------------------------------------------------------------------------------------------------|
| XVA143           | 0.7 nM                                                                                              | (Mancuso,<br>Welzenbach,<br>Steinberger,<br>Krahenbuhl & Weitz-<br>Schmidt, 2016) | Concentration used 10 µM                                                                                                                                                                                                                                                                            |
| LFA878           | 96 nM                                                                                               | (Mancuso,<br>Welzenbach,<br>Steinberger,<br>Krahenbuhl & Weitz-<br>Schmidt, 2016) | Concentration used 10 µM                                                                                                                                                                                                                                                                            |
| BIRT377          | 26 nM (Kd value)                                                                                    | (Kelly et al., 1999)                                                              | Concentration used 10 µM                                                                                                                                                                                                                                                                            |
| Firategrast      | na                                                                                                  | na                                                                                | Based on IC50 values published<br>for derivatives, the IC50 of<br>firategrast is assumed to be in<br>the low nM range (Baiula);<br>concentration used 10 µM                                                                                                                                         |
| RO0505376        | 11 nM                                                                                               | Mancuso,<br>unpublished data                                                      | Concentration used 10 µM                                                                                                                                                                                                                                                                            |
| Lifitegrast      | 3 nM                                                                                                | Mancuso,<br>unpublished data                                                      | Concentration used 10 µM                                                                                                                                                                                                                                                                            |
| mAb R7.1         | 10 µg mL <sup>-1</sup> results in 70%<br>inhibition                                                 | (Lorenz, Harrer,<br>Lagoo, Baur, Eger &<br>Kalden, 1993)                          | R7.1 is commonly used at<br>10 µg mL <sup>-1</sup> in functional studies;<br>concentration used 10 µg mL <sup>-1</sup>                                                                                                                                                                              |
| mAb TS1/22       | 5 µg mL <sup>-1</sup> results in<br>complete inhibition                                             | (Petruzzelli, Maduzia<br>& Springer, 1998)                                        | Concentration used 10 µg mL <sup>-1</sup>                                                                                                                                                                                                                                                           |
| Efalizumab       | 0.06 µg mL <sup>-1</sup>                                                                            | (Mancuso,<br>Welzenbach,<br>Steinberger,<br>Krahenbuhl & Weitz-<br>Schmidt, 2016) | Therapeutic serum levels:<br>10 µg mL <sup>-1</sup><br>(Guttman-Yassky et al., 2008);<br>concentration used 10 µg mL <sup>-1</sup>                                                                                                                                                                  |
| Natalizumab      | 10 µg mL <sup>-1</sup> =saturating<br>amount                                                        | (Sehr et al., 2016)                                                               | Trough serum levels:<br>MS patients: 29 µg mL <sup>-1</sup><br>Crohn's patients: 10 µg mL <sup>-1</sup><br>(Ref.: described in US package<br>insert Tysabri); concentration<br>used 10 µg mL <sup>-1</sup>                                                                                          |
| Vedolizumab      | 0.02–0.06 µg mL <sup>-1</sup>                                                                       | (Soler, Chapman,<br>Yang, Wyant, Egan &<br>Fedyk, 2009)                           | Trough serum levels:<br>Ulcerative colitis: 26.3 µg mL <sup>-1</sup><br>(week 0-6); 11 µg mL <sup>-1</sup> (week >6)<br>Crohn's disease: 27.4 µg mL <sup>-1</sup><br>(week 0-6); 13 µg mL <sup>-1</sup> (week >6)<br>(Ref. US package insert Entyvio);<br>concentration used 10 µg mL <sup>-1</sup> |

mAb: monoclonal antibody; na: not available

## References cited in Table S1

Mancuso RV, Welzenbach K, Steinberger P, Krahenbuhl S, & Weitz-Schmidt G (2016). Downstream effect profiles discern different mechanisms of integrin  $\alpha$ L $\beta$ 2 inhibition. *Biochem Pharmacol* 119: 42-55.

Kelly TA, Jeanfavre DD, McNeil DW, Woska JR, Jr., Reilly PL, Mainolfi EA, *et al.* (1999). Cutting edge: a small molecule antagonist of LFA-1-mediated cell adhesion. *J Immunol* 163: 5173-5177.

Lorenz HM, Harrer T, Lagoo AS, Baur A, Eger G, & Kalden JR (1993). CD45 mAb induces cell adhesion in peripheral blood mononuclear cells via lymphocyte function-associated antigen-1 (LFA-1) and intercellular cell adhesion molecule 1 (ICAM-1). *Cell Immunol* 147: 110-128.

Petruzzelli L, Maduzia L, & Springer TA (1998). Differential requirements for LFA-1 binding to ICAM-1 and LFA-1-mediated cell aggregation. *J Immunol* 160: 4208-4216.

Sehr T, Proschmann U, Thomas K, Marggraf M, Straube E, Reichmann H, *et al.* (2016). New insights into the pharmacokinetics and pharmacodynamics of natalizumab treatment for patients with multiple sclerosis, obtained from clinical and in vitro studies. *J Neuroinflammation* 13: 164.

Soler D, Chapman T, Yang LL, Wyant T, Egan R, & Fedyk ER (2009). The binding specificity and selective antagonism of vedolizumab, an anti- $\alpha$ 4 $\beta$ 7 integrin therapeutic antibody in development for inflammatory bowel diseases. *J Pharmacol Exp Ther* 330: 864-875.

**Figure S1**

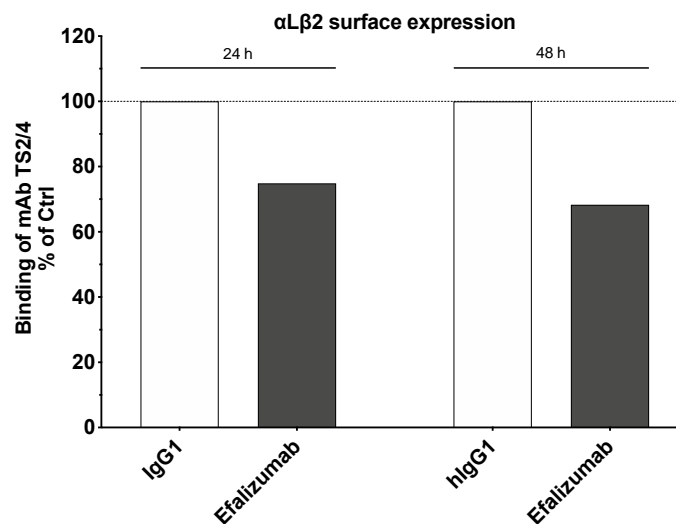

**Figure S1: Effect of efalizumab on integrin  $\alpha$ L $\beta$ 2 surface expression.** Surface expression of  $\alpha$ L $\beta$ 2 on CD2+ T cells after 24 hours and 48 hours of treatment with anti- $\alpha$ L $\beta$ 2 efalizumab ( $10 \mu\text{g mL}^{-1}$ ), and respective isotype control (hlgG1). Each bar represents a single determination using blood from one donor.

**Figure S2:**

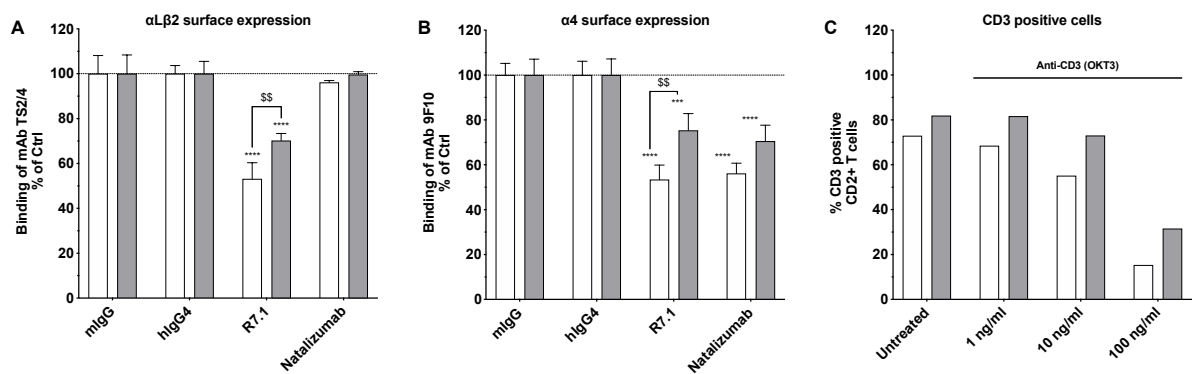

**FIGURE S2: Effect of dynasore on mAb R7.1-induced  $\alpha$ L $\beta$ 2 and  $\alpha$ 4 downmodulation, natalizumab-induced  $\alpha$ 4 downmodulation and mAb OKT3-induced downmodulation of CD3.** Surface expression of **(A)**  $\alpha$ L $\beta$ 2 and **(B)**  $\alpha$ 4 integrin on CD2+ T cells after 24 hours of treatment with anti- $\alpha$ L R7.1 ( $10 \mu\text{g mL}^{-1}$ ), anti- $\alpha$ 4 natalizumab ( $10 \mu\text{g mL}^{-1}$ ), and respective isotype controls (mIgG1, hIgG4). Treatments were performed in the presence of dynasore ( $40 \mu\text{M}$ , grey bars) or DMSO (white bars). Each bar represents the mean value  $\pm$  SEM of 6 independent experiments using blood samples from different donors. Statistical significance was determined by using one-way ANOVA,  $***P < 0.001$ ,  $****P < 0.0001$  vs control, and two-way ANOVA,  $^{\$}P < 0.01$  vs incubation without dynasore. **(C)** Surface expression of CD3 on CD2+ T cells after 24 hours of treatment with anti-CD3 OKT3 ( $1 \text{ ng mL}^{-1}$ ,  $10 \text{ ng mL}^{-1}$ ,  $100 \text{ ng mL}^{-1}$ ) in the presence of dynasore ( $40 \mu\text{M}$ , grey bars) or DMSO (white bars). Each bar represents a single determination, using blood from one donor.
